# Supplementary material
Source: MDPI journal article supplement (https://www.mdpi.com/2673-8015/4/1/14)
Supplement: s1 [file s1]

# Exploring Solvation Properties of Protic Ionic Liquids by Employing Solvatochromic Dyes and Molecular Dynamics Simulation Analysis

Stuart J. Brown<sup>a</sup>, Andrew J. Christofferson<sup>a</sup>, Calum J. Drummond<sup>a</sup>, Qi Han<sup>a</sup>, Tamar L. Greaves<sup>a</sup>

<sup>a</sup> School of Science, STEM College, RMIT University, Melbourne, VIC 3000, Australia

\* Corresponding author: tamar.greaves@rmit.edu.au

Table S1. The water content of each PIL as measured by Karl Fischer titration.

|       | Water Content (wt%) |
|-------|---------------------|
| PAF   | 0.089               |
| PAG   | 0.364               |
| BAG   | 0.431               |
| PeAG  | 0.200               |
| EAL   | 0.969               |
| PAL   | 0.718               |
| BAL   | 1.055               |
| EtAA  | 0.276               |
| DEtAA | 0.540               |
| EAN   | 0.081               |
| PAN   | 0.103               |
| EAf   | 2.735               |

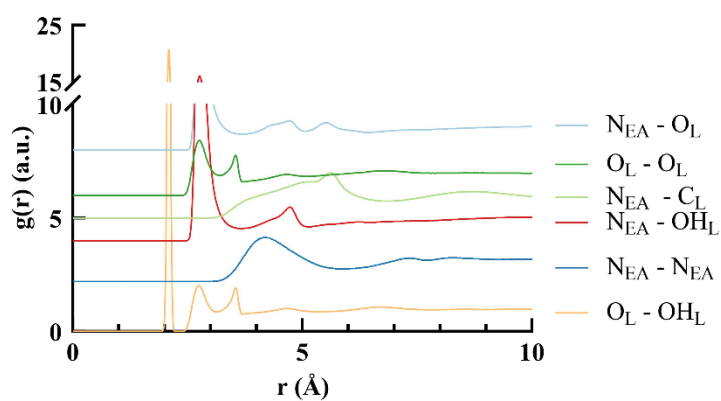

Figure S1. The RDF plots of EAL

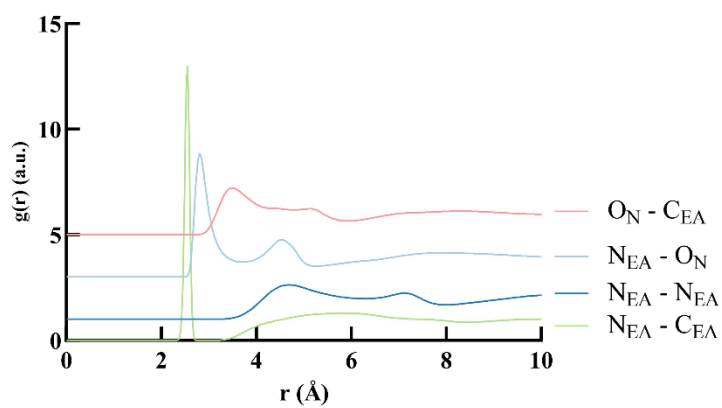

Figure S2. The RDF plots of EAN.

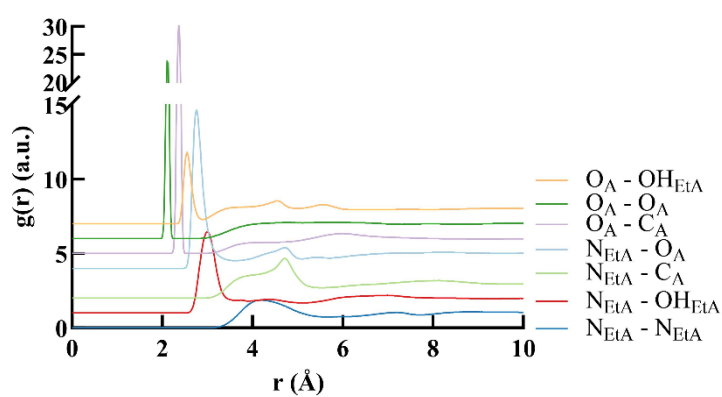

Figure S3. The RDF plots of EtAA

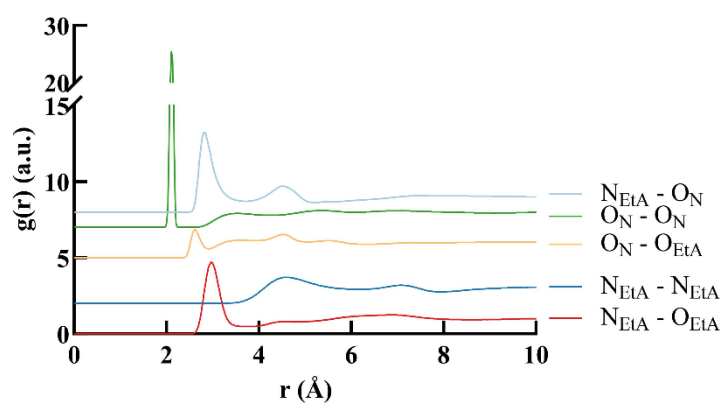

Figure S4. The RDF plots of EtAN

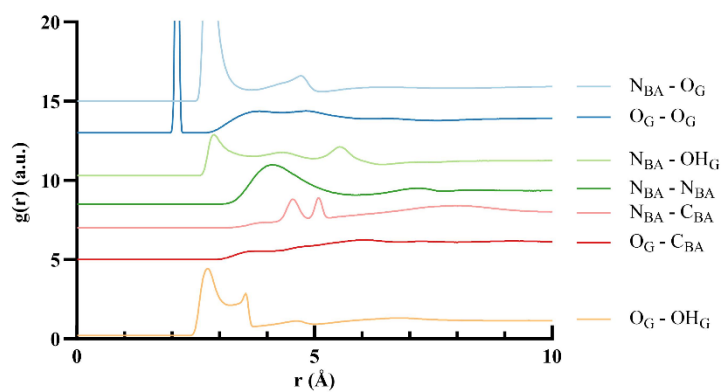

Figure S5. The RDF plots of BAG.

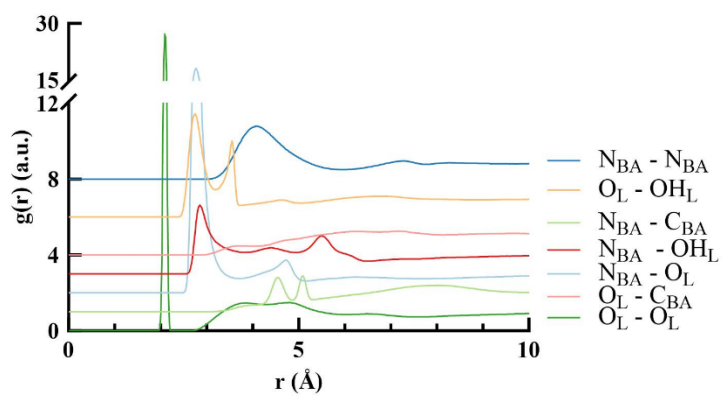

Figure S6. The RDF plots of BAL.

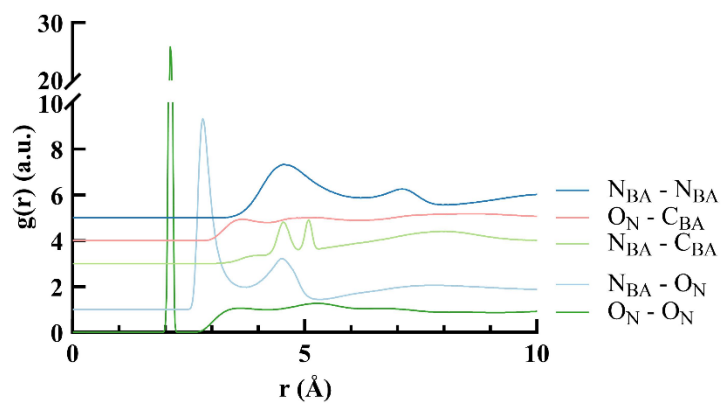

Figure S7. The RDF plots of BAN.

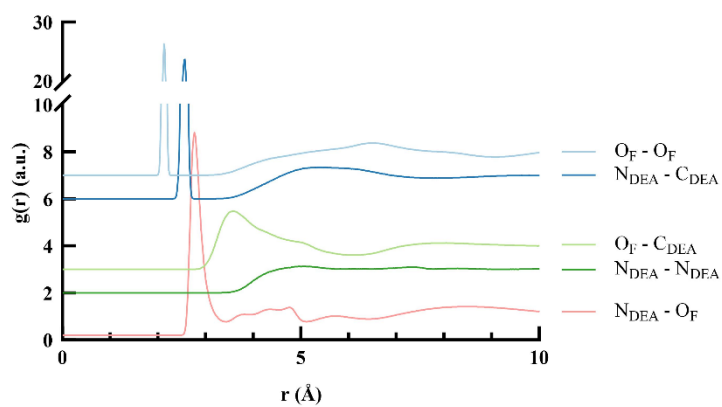

Figure S8. The RDF plots of DEAF.

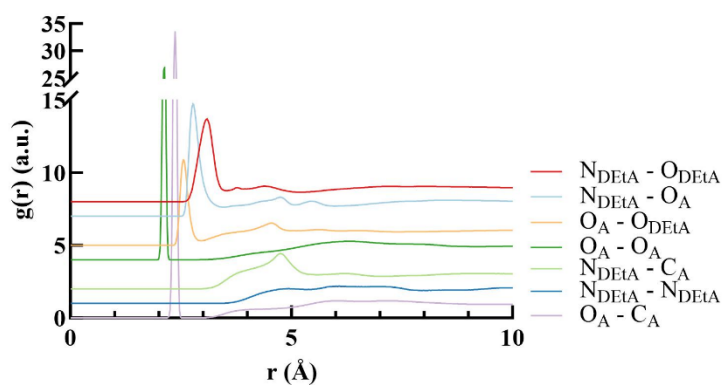

Figure S9. The RDF plots of DEtAA.

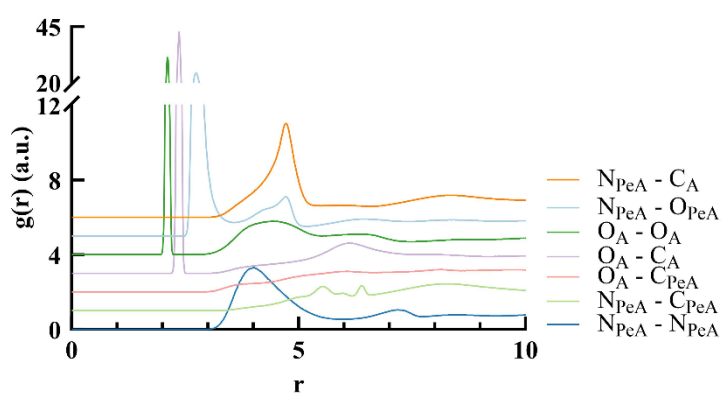

Figure S10. The RDF plots of PeAA.

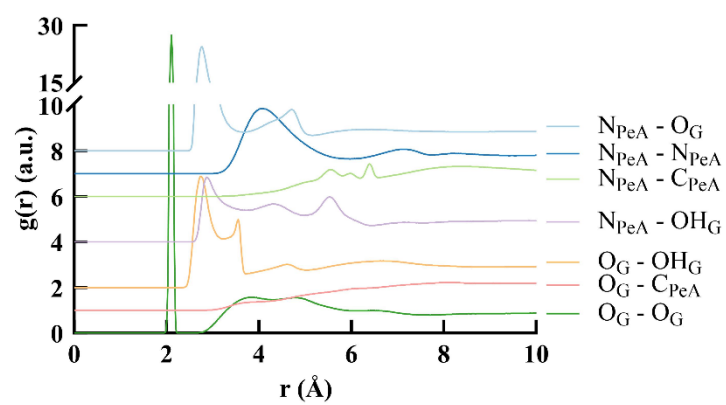

Figure S11. The RDF plots of PeAG.
